# Supplementary material for: First-principles explorations of the electrochemical lithiation dynamics of a multilayer graphene nanosheet-based sulfur–carbon composite
Source: Royal Society of Chemistry journal article supplement (doi:10.1039/c8ta04375b), 2018-01-01
Supplement: c8ta04375b1.pdf [file c8ta04375b1.pdf]

## Supplemental Information for

# First-Principles Explorations of the Electrochemical Lithiation Dynamics of a Multilayer Graphene Nanosheet-based Sulfur-Carbon Composite

Saul Perez Beltran and Perla B. Balbuena\*

Department of Chemical Engineering, Texas A&M University, College Station, TX 77843

\*e-mail: [balbuena@tamu.edu](mailto:balbuena@tamu.edu)

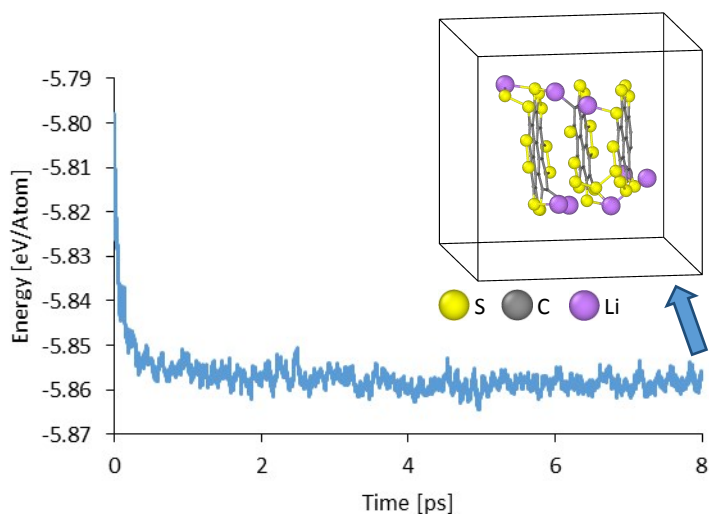

Figure S1: AIMD energy profile at a Li/S molar ratio of 0.25. DOL molecules not shown for clarity.

Table S1: The table below shows the total energy at three different lithium contents after structural optimizations (SC-Li composite + DOL) performed with and without spin polarization. Comparison between the two calculations shows no energy differences above  $4 \times 10^{-4}$  eV. With our systems having up to 544 atoms on average, this energy difference is considered negligible, leading us to ignore spin polarization effects in our calculations

| Li:S   | Non Spin polarized [eV] | Spin Polarized [eV] | Spin - Non Spin polarized [eV] |
|--------|-------------------------|---------------------|--------------------------------|
| 0.00:1 | -3.11E+03               | -3.11E+03           | -0.00040                       |
| 1.00:1 | -3.23E+03               | -3.23E+03           | -0.00040                       |
| 2.00:1 | -3.15E+03               | -3.15E+03           | -0.00040                       |
